# Supplementary material
Source: PubMed Central journal article supplement (PMC6867312)
Supplement: ehp-127-107005-s003.pdf [file ehp-127-107005-s003.pdf]

**Note to readers with disabilities:** *EHP* strives to ensure that all journal content is accessible to all readers. However, some figures and Supplemental Material published in *EHP* articles may not conform to [508 standards](#) due to the complexity of the information being presented. If you need assistance accessing journal content, please contact [ehp508@niehs.nih.gov](mailto:ehp508@niehs.nih.gov). Our staff will work with you to assess and meet your accessibility needs within 3 working days.

### **Supplemental Material**

#### **Diet as a Source of Exposure to Environmental Contaminants for Pregnant Women and Children from Six European Countries**

Eleni Papadopoulou, Line Småstuen Haug, Amrit Kaur Sakhi, Sandra Andrusaityte, Xavier Basagaña, Anne Lise Brantsaeter, Maribel Casas, Sílvia Fernández-Barrés, Regina Grazuleviciene, Helle Katrine Knutsen, Lea Maitre, Helle Margrete Meltzer, Rosemary R. C. McEachan, Theano Roumeliotaki, Remy Slama, Marina Vafeiadi, John Wright, Martine Vrijheid, Cathrine Thomsen, and Leda Chatzi

#### **Table of Contents**

**Additional File-** Excel Document
